# Supplementary material for: The Effect of Blood Flow Restriction Pressure on Acute and 24-Hour Recovery Following Upper-Limb Repeated High-Intensity Exercise in Boxers
Source: Research Square preprint supplement (doi:10.21203/rs.3.rs-8489574/v1), 2026-01-13
Supplement: Supplementary file 1 [file cff35532375b8e94a3943c02.docx]

**Health Screening Questionnaire for Blood Flow Restriction Training Study**

Section A: Participant Information

This information will be kept strictly confidential and used only for screening purposes.

Participant ID: ________________

Date: ______/______/______

Age: ______ years

Sex: □ Male □ Female □ Other / Prefer not to say

Section B: Contraindication Screening Checklist

Instructions: Please read each question carefully and check “Yes” or “No” truthfully. If you are unsure about any question, please ask the researcher for clarification. A “Yes” answer to any question may require further medical consultation and could exclude you from participation.

1. Do you have a history of or currently diagnosed cardiovascular disease (e.g., heart failure, coronary artery disease, heart attack, arrhythmia)?

Yes □ No □

2. Do you have a history of or currently diagnosed cerebrovascular disease (e.g., stroke, transient ischemic attack)?

Yes □ No □

3. Do you have a history of **deep vein thrombosis (DVT) or pulmonary embolism (PE)?

Yes □ No □

4. Do you have a known peripheral vascular disease or impairment in limb circulation (e.g., severe varicose veins, Raynaud's disease)?

Yes □ No □

5. Do you have uncontrolled hypertension? (Typically defined as resting systolic blood pressure >140 mmHg or diastolic >90 mmHg)

Yes □ No □

6. Have you had any major surgery, trauma, or fracture in the past 6 months, especially involving the limbs to be trained?

Yes □ No □

7. Are you currently pregnant or do you suspect you might be pregnant?

Yes □ No □

8. Do you have a known blood clotting disorder (e.g., hemophilia, thrombophilia) or are you taking anti-coagulant medication (e.g., warfarin)?

Yes □ No □

9. Do you have any active infection, open wound, or skin lesion on the area where the pressure cuff would be applied?

Yes □ No □

10. Do you have a history of cancer currently under treatment or in the past 5 years?

Yes □ No □

11. Do you have sickle cell disease or trait?

Yes □ No □

12. Do you have any diagnosed renal (kidney) disease?

Yes □ No □

13. Do you have any other current or chronic medical condition not listed above that you believe could be affected by restricted blood flow?

If yes, please specify: ___________________________ Yes □ No □

14. Do you have a personal or family history of adverse reactions to blood flow restriction or similar physical stressors?

Yes □ No □

15. Are you currently experiencing any undiagnosed pain, numbness, tingling, or swelling in the limbs to be tested?

Yes □ No □

Participant Declaration

I confirm that I have read and understood the questions above. I have answered them to the best of my knowledge truthfully and completely. I understand that providing inaccurate information could pose a risk to my health during the study.

I understand that my eligibility for participation is contingent upon the results of this screening and may require approval from my physician.

Participant Signature: _________________________

Date: ______/______/______

---

**For Researcher Use Only**

Screening Outcome: □ Cleared for Participation □ Not Cleared - Contraindication Present (Specify Q#): _____

Researcher’s Name/Initials: ______________

Date Reviewed: ______/______/______

**血流限制（BFR）训练研究健康筛查问卷**

第一部分：参与者基本信息

本信息将严格保密，仅用于筛查目的。

参与者编号：________________

日期： ______年______月______日

年龄：______ 岁

性别： □ 男　□ 女　□ 其他 / 不愿透露

第二部分：禁忌症筛查清单

说明： 请仔细阅读每个问题，如实勾选“是”或“否”。如果您对任何问题不确定，请向研究人员询问。对任何问题回答“是”，都可能需要进一步医学评估，并可能导致您无法参与本研究。

1. 您是否有心血管疾病病史或现病史（例如：心力衰竭、冠心病、心脏病发作、心律失常）？

是 □ 否 □

2. 您是否有脑血管疾病病史或现病史（例如：中风、短暂性脑缺血发作）？

是 □ 否 □

3. 您是否有深静脉血栓（DVT）或肺栓塞（PE）病史？

是 □ 否 □

4. 您是否患有已知的外周血管疾病或肢体循环障碍（例如：严重静脉曲张、雷诺病）？ 是 □ 否 □

5. 您是否有未控制的高血压？（通常定义为静息收缩压 >140 mmHg 或舒张压 >90 mmHg）

是 □ 否 □

6. 过去6个月内，您是否接受过任何大手术、遭受严重创伤或骨折，尤其是涉及待训练肢体？

是 □ 否 □

7. 您目前是否怀孕或怀疑自己可能怀孕？

是 □ 否 □

8. 您是否有已知的凝血功能障碍（例如：血友病、血栓形成倾向）或正在服用抗凝药物（例如：华法林）？

是 □ 否 □

9. 在压力袖带将要绑缚的部位，是否有活动性感染、开放性伤口或皮肤破损？

是 □ 否 □

10. 您是否有癌症病史（目前正在治疗或过去5年内）？

是 □ 否 □

11. 您是否患有镰状细胞病或具有镰状细胞特征？

是 □ 否 □

12. 您是否有任何确诊的肾脏疾病？

是 □ 否 □

13. 您是否有上文未列出的任何其他现有或慢性疾病，且您认为可能受到血流限制的影响？如有，请说明：___________________________ 是 □ 否 □

14. 您个人或家族是否有对血流限制或类似物理应激源产生不良反应的历史？

是 □ 否 □

15. 您目前待测试的肢体是否存在任何未确诊的疼痛、麻木、刺痛或肿胀？

是 □ 否 □

参与者声明

本人确认已阅读并理解上述问题。本人已尽所知，如实、完整地回答了所有问题。本人理解，提供不准确的信息可能会在本研究期间对我的健康构成风险。

我理解，我的参与资格取决于本次筛查的结果，并可能需要得到我的医生的批准。

参与者签名： _________________________

日期： ______年______月______日

---

**仅供研究人员回答**

筛查结果： □允许参与　　□ 不允许参与 - 存在禁忌症（请注明问题编号）：_____

研究人员姓名/缩写： ______________

审核日期： ______年______月______日
